# Supplementary material
Source: publisher site journal article supplement (https://www.dovepress.com/article/575863)
Supplement: Supplementary file 1 [file 575863_Supplementary%20Fig%20S1-S3.docx]

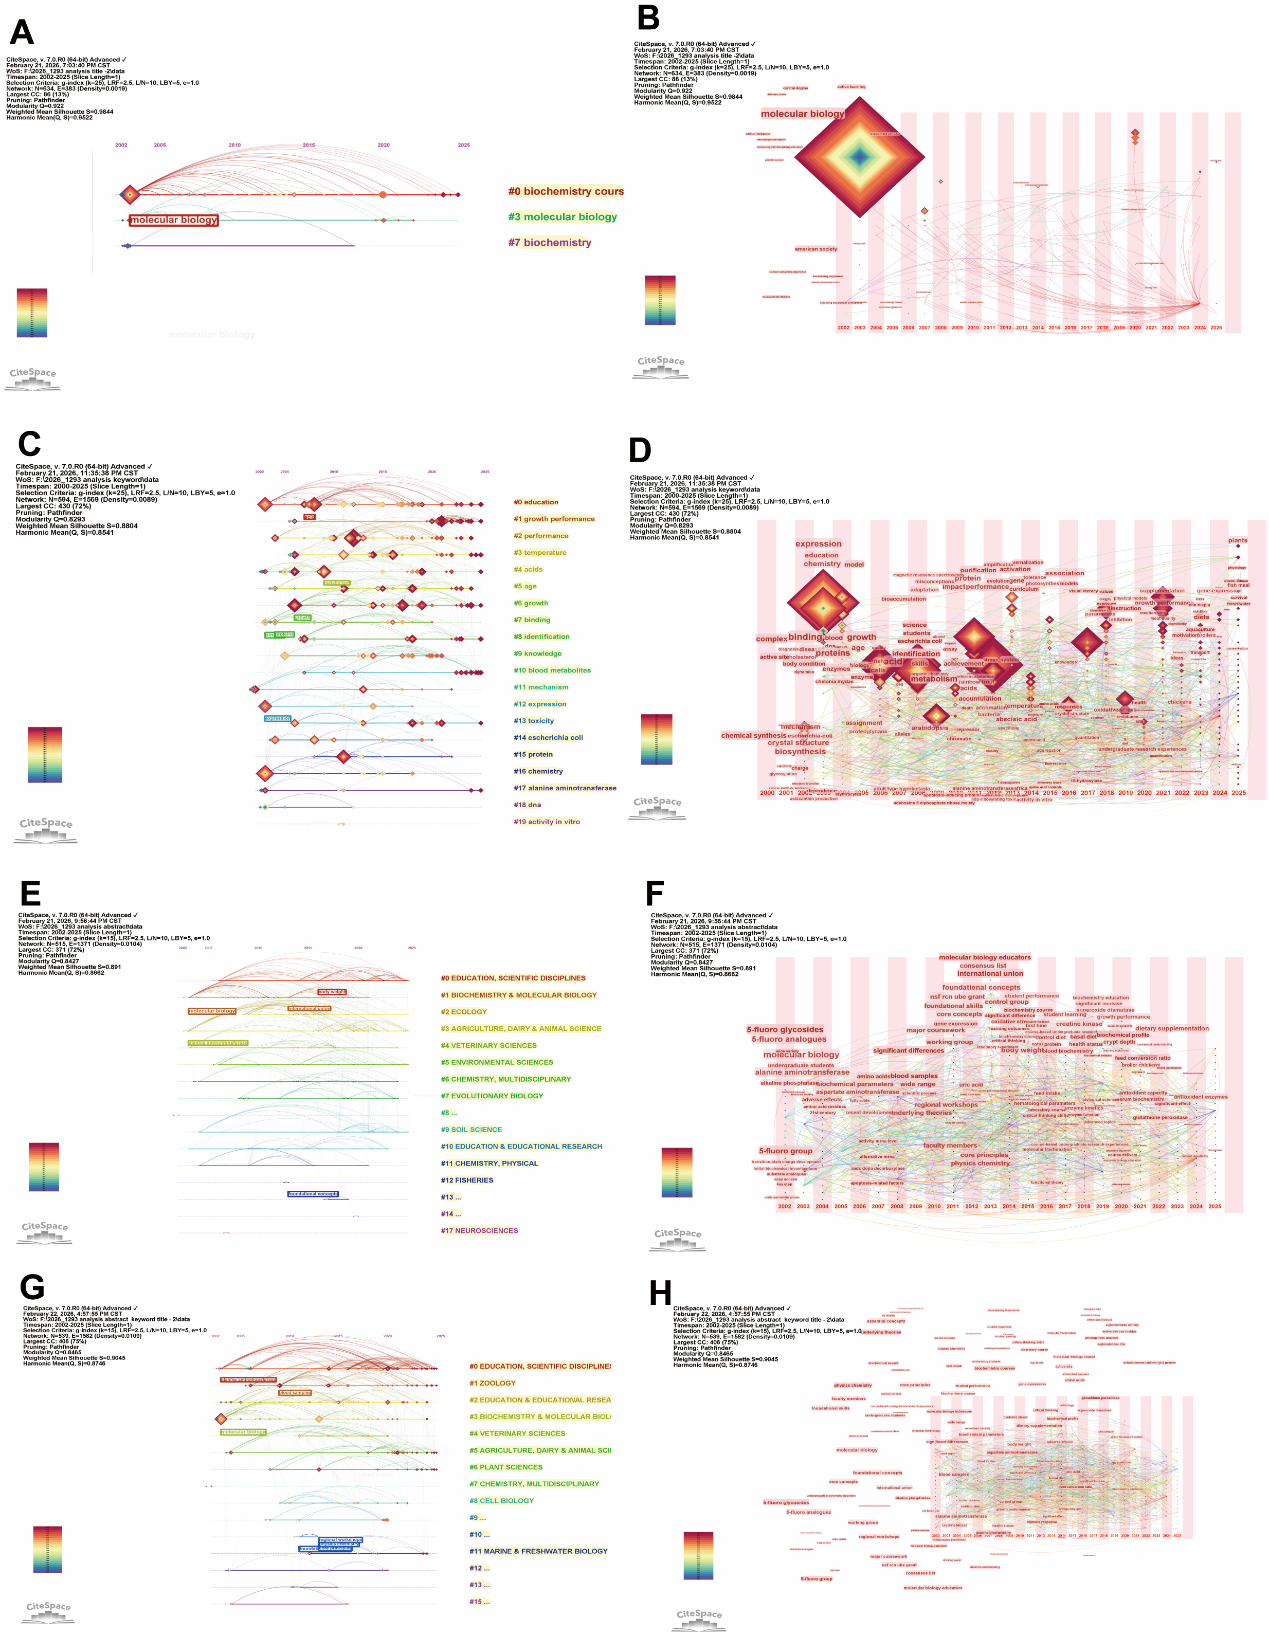


**Fig. S1. The terms** **in the titles, abstracts and keywords from the BMB education literature were clustered and visualized in timeline or time zone model by Citespace.**

**A**. A timeline visualization was created by pinpointing burst keywords in the titles of BMB education literature.

**B**. The time zone chart illustrated the research trends during various time periods and indicated the developmental trajectory over time.

**C**. Keyword clusters from BMB education literature were shown in a timeline diagram.

**D**. Keyword clusters from BMB education literature were shown in a time zone diagram.

**E**. The high frequency terms clusters in the abstracts from BMB education literaturewere shown in a timeline model.

**F**. The high frequency terms clusters in the abstracts from BMB education literaturewere shown in a time zone model.

**G**. The high frequency terms from titles, keywords and abstract of BMB education literature were clustered and shown in a timeline-based visualization.

**H**. The high frequency terms from titles, keywords and abstract of BMB education literature were clustered and shown in a time zone-based visualization.


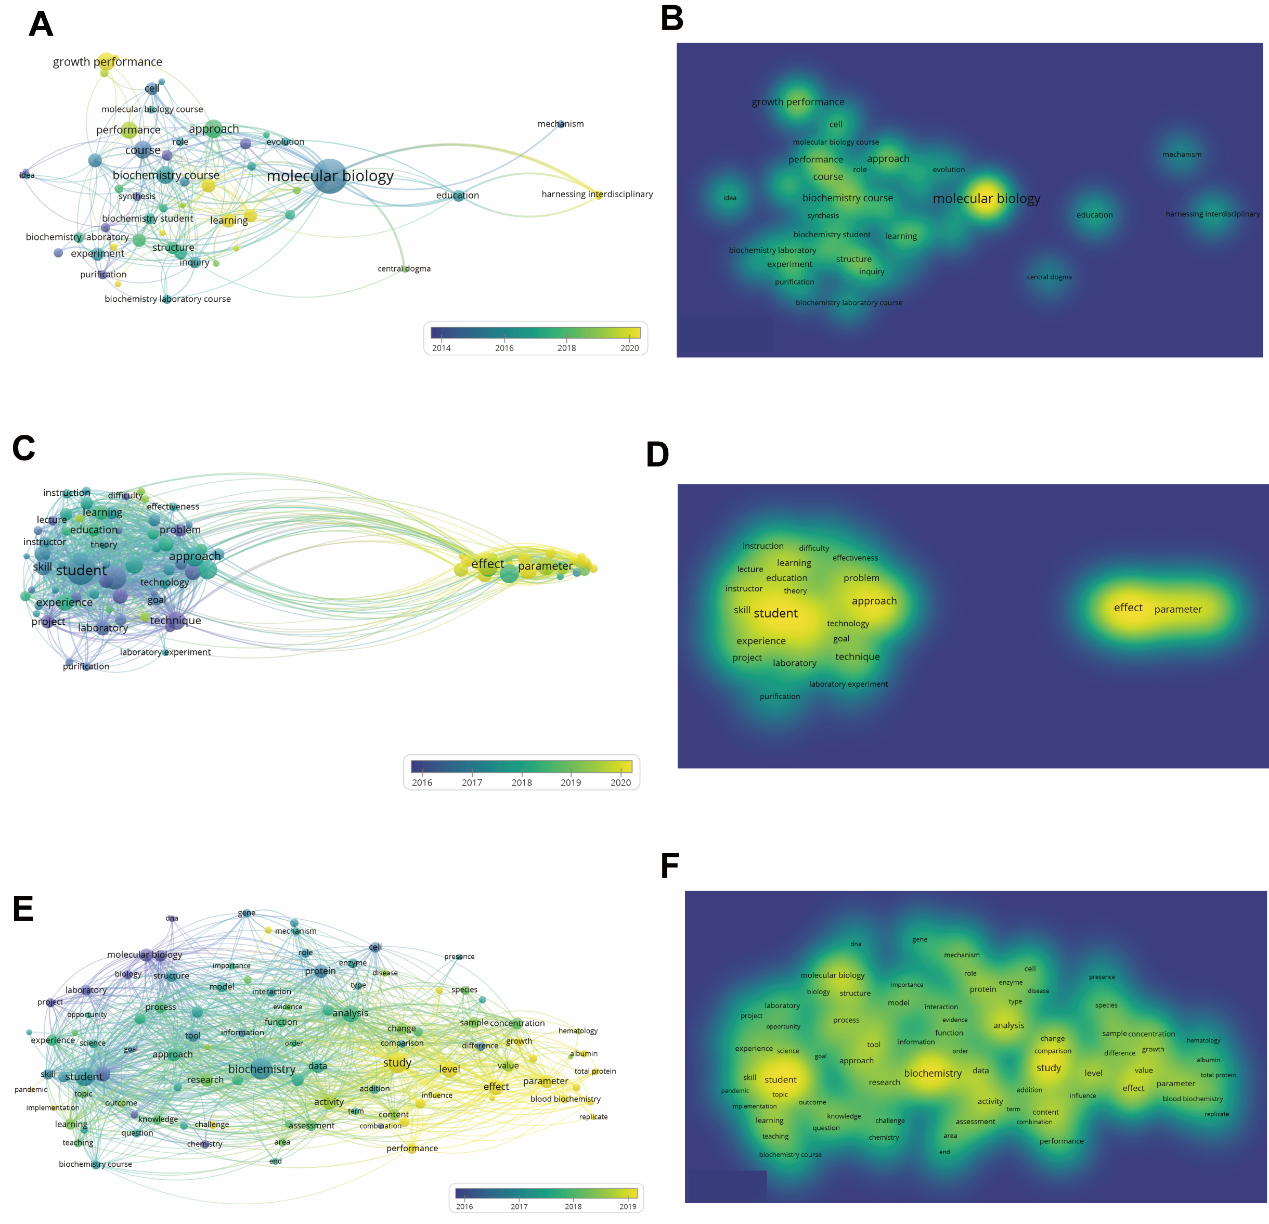


**Fig. S2. The terms in the titles,** **abstracts and both from the BMB education literature were summarized and visualized by VOSviewer in an overlay or density model.**

**A.** The title network was shown in a network overlay model.

**B.** The title network was shown in a network density map.

**C.** The abstract network was illustrated in a network overlay model.

**D.** The abstract network was illustrated in a network density map.

**E.** The title-abstract network was indicated in a network overlay model.

**F.** The title-abstract network was indicated in a network density map.


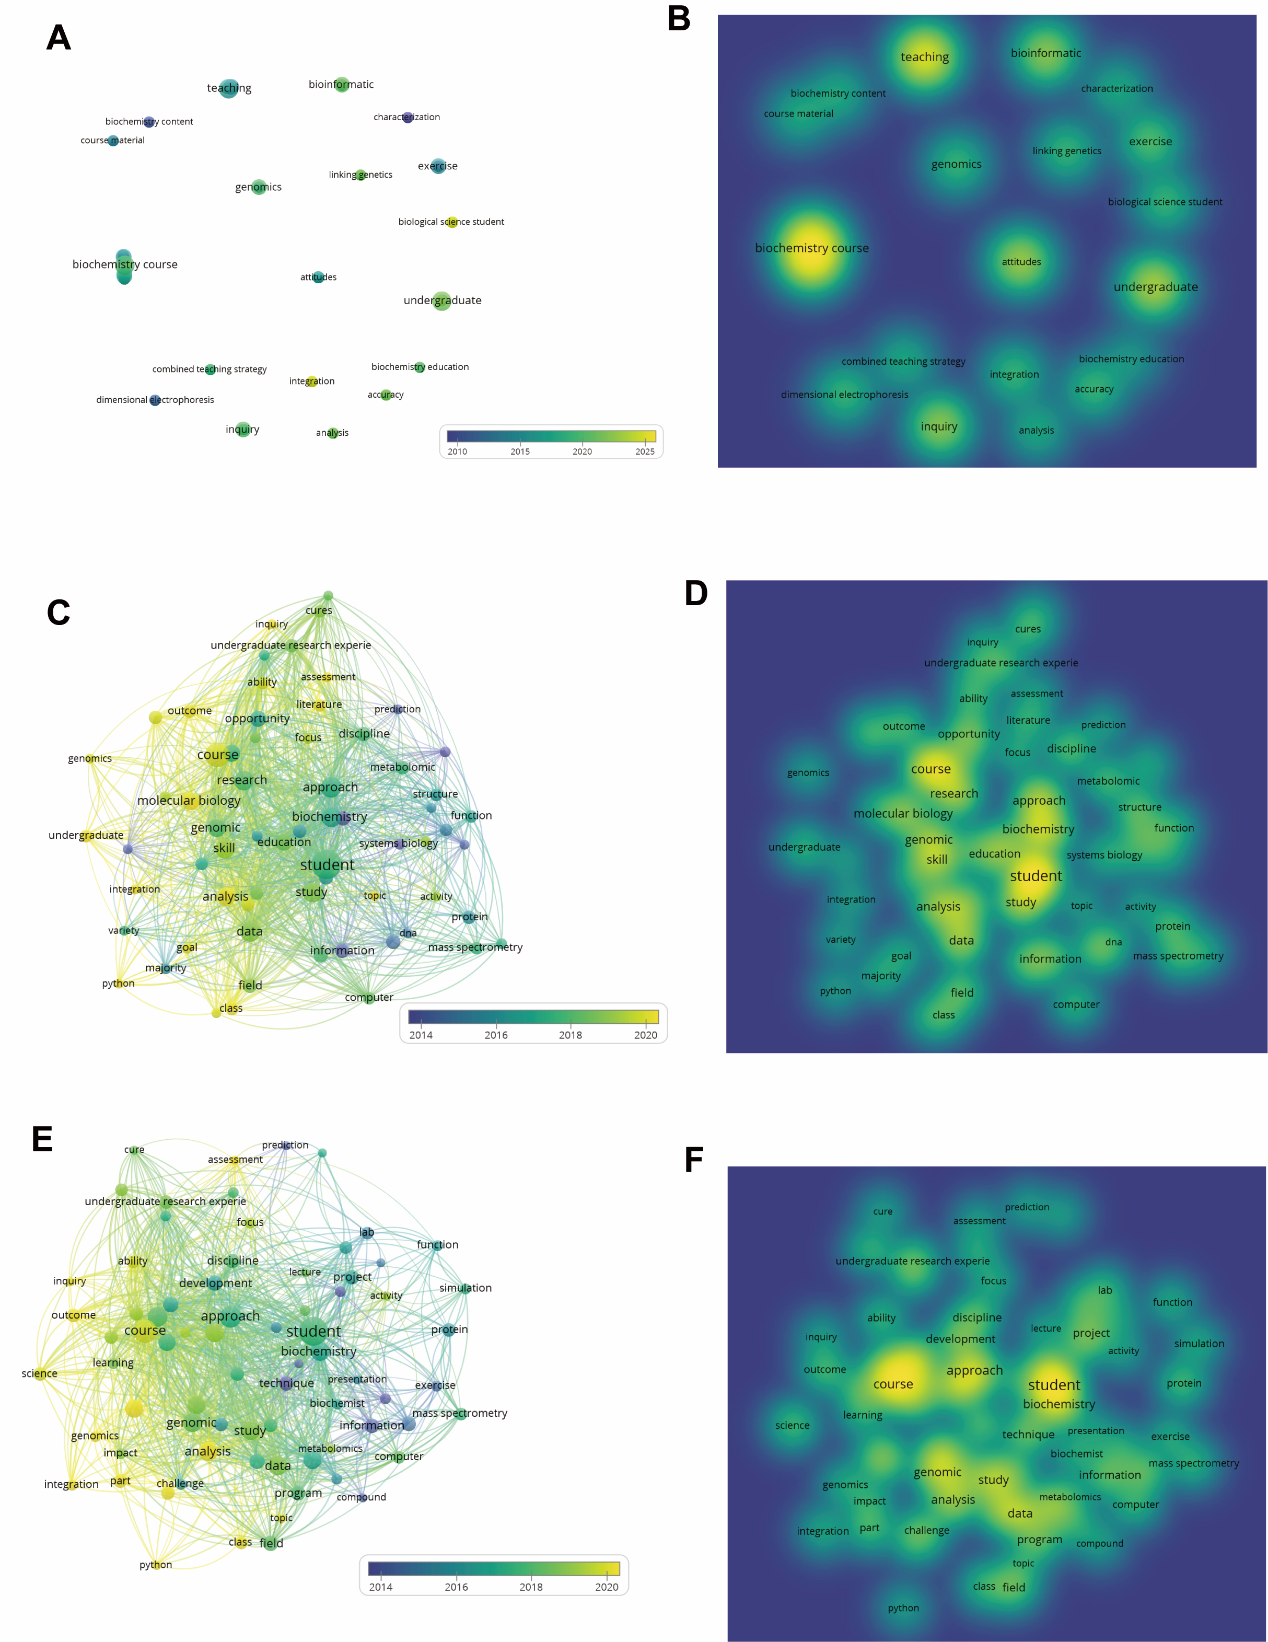


**Fig. S3. The terms in the titles, abstracts and both from the omics-specific BMB education literature were summarized and visualized by VOSviewer in an overlay or density model.**

**A.** The title networks were demonstrated in a network overlay model.

**B.** The title network was demonstrated in a network density map.

**C.** The abstract network was exhibited in a network overlay model.

**D.** The abstract network was exhibited in a network density map.

**E.** The title-abstract network was illustrated in a network overlay model.

**F.** The title-abstract network was illustrated in a network density map.
